# Supplementary material
Source: publisher figshare collection journal article supplement (https://gsapubs.figshare.com/ndownloader/files/23297399)
Supplement: Supplementary file 1 [file 23297399]

Table DR1. Significant carnallite occurrences worldwide, compiled from Warren (2010) and various key referencs as listed

| Location, Country                                                | Age                      | Brine source | Targeted mining unit     | Comments/key Reference                                                                                                                                                                                                                                                                                                                                                                                                                                        | Known igneous activity (syn- to post-deposition of salt sequences)                                                                                                                                                                                                                |
|------------------------------------------------------------------|--------------------------|--------------|--------------------------|---------------------------------------------------------------------------------------------------------------------------------------------------------------------------------------------------------------------------------------------------------------------------------------------------------------------------------------------------------------------------------------------------------------------------------------------------------------|-----------------------------------------------------------------------------------------------------------------------------------------------------------------------------------------------------------------------------------------------------------------------------------|
| Potash in Congo and Gabon basins, Africa (Congo, Zaire, Angola)  | Cret. Low.               | Marine       | Kouilou horizons         | Carnallite, sylvinite in halite host, variable tachyhydrite (Aptian). Previously mined at Holle Mine (Republic of Congo) in 2 variable layers of 1.9 m and 3 m thickness (De Ruiter, 1979)                                                                                                                                                                                                                                                                    | Various phases of volcanic activity post-salt deposition from Eocene to Pliocene in Eastern Neuquén Basin (Urien and Zambrano, 1994)                                                                                                                                              |
| Neuquén and Mendoza Basins, Andes, Argentina                     | Cret.                    | Marine       | Potash interval          | Possible future solution mine. Sylvinite ore divided into 2 zones, upper zone about 3 m thick and lower about 11 m thick. A 1000m depth and high formation temperature (>50°C) precludes conventional mine (Prud'homme and Krukowski, 2006).                                                                                                                                                                                                                  |                                                                                                                                                                                                                                                                                   |
| Pripyat Depression, Belarus                                      | Devonian, Upper          | Marine       | Liven and Elets horizons | Livet (Frasnian) interval is made up of four potash horizons with areas between 130 to 1500 sq. km. Sylvite ore with minor carnallite in beds 4cm to 1.5 m thick interbedded with muddy halite. Elets (Fammenian) interval > 60 potash beds over 5,000 sq. km at depth of 200 to 3,000m. (Zharkov, 1984)                                                                                                                                                      |                                                                                                                                                                                                                                                                                   |
| Sergipe Basin, Brazil                                            | Aptian, Early Cret.      | Marine       | Ibera member             | Taquari-Vassouras mine targets sylvinite beds in Muribeca Fm. found in association with halite host, variable carnallite, tachyhydrite (primary textures in unit up to 90 m thick) constituting some nine evaporite cycles deposited in an opening rift (Aptian). Tachyhydrite present. (Wardlaw, 1972)                                                                                                                                                       |                                                                                                                                                                                                                                                                                   |
| Amazonas Basin, Brazil                                           | U. Carb. - L Permian     | Marine       | Nova Olinda Fm.          | Twosylvinite deposits (sylvite cap to uppermost of 7 evaporite cycle, also with caranallite) near Manaus = 1000m depth , with average thickness of 2.7 m (Szatmari et al., 1979)                                                                                                                                                                                                                                                                              | Various phases of volcanic activity related to Aptian Rift opening, and further post-salt deposition events in the Paleocene/Eocene (Mohriak et al. 2008)                                                                                                                         |
| New Brunswick Potash, Fundy Basin, Canada                        | Carboniferous            | Marine       | Cassidy Lake Fm.         | Formerly mined at depths 300-100m in halokinetic salt wall, Mississippian sylvinite-halite sequence with local carnallite in Windsor Group in Moncton sub-basin. (Visean) (Anderle et al., 1979; Wilson and Roulston, 2006)                                                                                                                                                                                                                                   | Fundy Basin underwent post-salt deposition Central Atlantic Mamatic Province (CAMP) volcanism in Jurassic/Triassic (Cirilli, 2009)                                                                                                                                                |
| Alberta Potash Basin, Canada                                     | Devonian, Middle         | Marine       | Prairie Fm               | Actively mined, some ten mines (2 solution mines) at depths between 800-1000m, region is world's major supplier of potash ore. Three potash horizons (sylvite, carnallite, halite) 20-25m thick in upper part of Prairie Fm. (Esterhazy, Belle Plain and Patience Lake members). Dips gently to south at 1-8m/km with potash level some 600-2500m below surface. (Fuzesy, 1982)                                                                               | Volcanically active to present day, including fissure (dike) fed volcanism (see main paper for references)                                                                                                                                                                        |
| Dabuxum Lake (stratoid potash) Qahran Playa, Qaidam Basin, China | Quaternary               | Nonmarine    | Recent                   | Carnallite (via solar processing of lake brine along with bishofite). Transtensional basin at 2675m elev. (Warren 2010)                                                                                                                                                                                                                                                                                                                                       |                                                                                                                                                                                                                                                                                   |
| Dallol Saline pan, Ethiopia                                      | Quaternary               | Marine       | Houston Fm.              | Three members; uppermost is sylvinite member up to 10 thick; intermediate is 3-24 m thick with carnallite throughout, (sylvite at its top and kainite at its base) and lower member is kainite that is 4-13 m thick. It is a Pleistocene marine-fed unit that now lies beneath continental halite in a subsealevel (-115 msl) hydrographically-isolated marine-fed rift valley, region of active volcanism and hydrothermal overprints. (Garrett, 1995, 2004) |                                                                                                                                                                                                                                                                                   |
| Mulhouse Potash Basin, Rhine rift, France                        | Eocene-Oligocene         | Marine       | Upper Salt Group         | Main potash target is primary sylvite bed with carnallite layers in Salt IV in Oligocene Rupelian succession at depths between 420 and 1100m. (Cendon et al., 2008)                                                                                                                                                                                                                                                                                           |                                                                                                                                                                                                                                                                                   |
| Zechstein Potash Basin, Germany                                  | Permian, Upper           | Marine       | Zechstein Group          | Actively mined at depths between 300-800m, Zechstein comprises four evaporite cycles, with potash (sylvite target/±carnallite gangue) as across five ore horizons in lower three (Thuringen, Hessen, Stassfurt, Ronnenberg and Riedel) (Tatarian). Tachyhydrite present in Stassfurt. (Smith and Crosby, 1979; Richter-Bernberg, 1986))                                                                                                                       | See Paper                                                                                                                                                                                                                                                                         |
| Sicilian Basin, Italy                                            | Mioc., Late              | Marine       | Solfifera Series         | Mined but inactive since mid 1990s. Kainite was dominant ore mineral (manufactured potassium sulphate). Other minerals in ore were sylvite, kieserite, bischofite, and carnallite in 2-30m thick beds dipping to 60°.                                                                                                                                                                                                                                         | Underwent volcanism post-salt deposition during mid-miocene (Kaiserstuhl volcanics) (Hinsken et al. 2007)                                                                                                                                                                         |
| Pricaspian depression, Kazakhstan                                | Permian, Lower           | Marine       | "Potash interval"        | Potash interval contains polyhalite-halite, bishofite-carnallite, carnallite-halite, interval is strongly halokinetic in central part of basin. Oil wells also intersected several potash horizons in this region. (Kungurian). (Volozh et al., 2003; Garrett, 2004)                                                                                                                                                                                          |                                                                                                                                                                                                                                                                                   |
| Solikamsk depression, Russia                                     | Permian, Upper           | Marine       | Iren horizon             | Bezeneski and Solimgansk mines. potash interval lies at depths of 200-500m and is divided into lower sylvinite and upper sylvinite-carnallite, little to no MgSO4 salts. Av. lower interval thickness 21 m, upper interval 60m.(Zharkov, 1984). Little published data available about geology of basin                                                                                                                                                        |                                                                                                                                                                                                                                                                                   |
| Eastern Siberia Potash Basin, Russia                             | Camb. Lower              | Marine       | Chara horizon            | Potash (mostly sylvite/caranallite) lies at depths of 600-900m and contains some ore-grade sylvite intervals in Ussolye and Angara Fm. (Zharkov, 1984)                                                                                                                                                                                                                                                                                                        |                                                                                                                                                                                                                                                                                   |
| Catalonia and Navarra Potash Basins, Spain                       | Eoc. Upper               | Marine       |                          | Transitional from marine evaporite to continental, deposited in two depocentres in Southern Pyrenean foreland. Sylvite+halite at base of unit, carnallite + halite toward top (Bartonian). Lower sylvite member is ore bed. MgSO4-free. (Rosell and Orti, 1981; Cendon at al., 2003)                                                                                                                                                                          | Underwent post-salt depositon volcanism in Oligocene. Three large laccolithic intrusive bodies occur within the salt basin, and other near margins. USGS report mentions that igneous intrusion has occurred into Paradox Salt Formation, but no more details given (Baltz, 1957) |
| Khorat & Sakhon Nakhon Potash Basins, Thailand, Laos             | Cretaceous (Albian?)     | Marine       | Maha Sarakham Fm.        | Possible sylvinite target on basin margin. Widespread massive halite, carnallite (with local zones of sylvinite), tachyhydrite and bischofite traces of priceite/boracite. Unconformable base, interbedded with three continental redbed successions and overlain by continental deposits. Variably halokinetic toward basin centre.(Hite and Japakasetr, 1979; El Tabakh et al., 1999; Warren, 2000, 2006)                                                   |                                                                                                                                                                                                                                                                                   |
| Carpathian foredeep, Ukraine                                     | Mioc. Middle             | Marine       | Tyras Suite              | Stebnik mine and Kalush-Golyn region. Four evaporite cycles upper three with potash ; exploited potash units composed of kainite, langbeinite, kainite–langbeinite, sylvinite and carnallite rocks with layers of rock salt or interbedded clays and carbonates. Fourth bed is polyhalite (Hryniv et al., 2007)                                                                                                                                               |                                                                                                                                                                                                                                                                                   |
| Paradox Potash Basin, UT, USA                                    | Carboniferous (Penn.)    | Marine       | Paradox Fm.              | Solution mining of Paradox Fm. in converted conventional mine on Cane Creek anticline at a depth of 850 m. Middle Pennsylvanian collision basin related to Marathon-Ouchita orogeny, 18 of 29 halite cycles contain potash, mostly sylvite with carnallite. Tachyhydrite locally present. (Hite, 1961; Williams-Stroud, 1994)                                                                                                                                 |                                                                                                                                                                                                                                                                                   |
| Salado Potash Basin, NM, USA                                     | Perm.- Upp. Lower Trias. | Marine       | Salado Fm.               | Potash resource now largely depleted, 12 potash horizons in part of Delaware Basin known as McNutt Zone (sylvite ore), few mines still active. Ore zones contain sylvite, carnallite, lesser amounts of sulphate minerals such as polyhalite and langbeinite (Tatarian - Olenekian). (Lowenstein, 1988)                                                                                                                                                       | Underwent extensive post-salt deposition volcanism from Permian - Triassic, as part of the Siberian Traps (Reichow et al., 2009)                                                                                                                                                  |
| Michigan Basin, MI, USA                                          | Silurian, Lower          | Marine       | Salina A-1 Evap.         | Sylvinite ore and carnallite within central part of an intracratonic sag basin. Potash zone > 30m thick in central part of basin but ore concentration is erratic (Matthews and Egleson, 1974)                                                                                                                                                                                                                                                                |                                                                                                                                                                                                                                                                                   |

References:

Anderle, J. P., K. S. Crosby, and D. C. E. Waugh, 1979, Potash at Salt Springs, New Brunswick: Economic Geology, v. 74, p. 389-396.

Baltz, E.H., 1957, Distribution and thickness of salt in the Paradox Basin of southwestern Colorado and southeastern Utah; a preliminary report: USGS Trace Elements Investigations Report TEM-706, 42 p.

Cendon, D. I., C. Ayora, J. J. Pueyo, G. Taberner, and M. M. Blanc-Valleron, 2008, The chemical and hydrological evolution of the Mulhouse potash basin (France): Are "marine" ancient evaporites always representative of synchronous seawater chemistry?: Chemical Geology, v. 252, p. 109-124.

Cirilli S., Marzoli A., Tanner L., Bertrand H., Buratti N., Jourdan F., Bellieni G., Kontak D., Renne P.R., 2009, Latest Triassic onset of the Central Atlantic Magmatic Province (CAMP) volcanism in the Fundy Basin (Nova Scotia): New stratigraphic constraints: Earth and Planetary Science Letters, v. 286, p.514–525, doi: 10.1016/j.epsl.2009.07.021.

de Ruiter, P. A. C., 1979, The Gabon and Congo basins salt deposits: Economic Geology, v. 74, p. 419-431.

El Tabakh, M., C. Utha-Aroon, and B. C. Schreiber, 1999, Sedimentology of the Cretaceous Maha Sarakham evaporites in the Khorat Plateau of northeastern Thailand: Sedimentary Geology, v. 123, p. 31-62.

Fuzesy, A., 1982, Potash in Saskatchewan: Report, Saskatchewan Department of Mineral Resources, v. 181, 45 p.

Garrett, D. E., 1995, Potash: Deposits, processing, properties and uses: Berlin, Springer, 752 p.

Garrett, D. E., 2004, Handbook of Lithium and natural Calcium Chloride: Their deposits, processing, uses and properties Amsterdam, Elsevier Academic Press, 476 p.

Hinsken, S., Ustaszewski, K., Wetzal A., 2007, Graben width controlling syn-rift sedimentation: the Palaeogene southern Upeer Rhine Graben as an example, Int. J. Earth Sci. (Geologische Rundschau), 96 (2007), pp. 979–1002

Hite, R. J., 1961, Potash-bearing evaporite cycles in the salt anticlines of the Paradox Basin, Colorado and Utah; Article 337: U. S. Geological Survey Professional Paper. p. D323-D327.

Hite, R. J., and T. Japakasetr, 1979, Potash deposits of the Khorat Plateau, Thailand and Laos: Economic Geology, v. 74, p. 448-458.

Hryniv, S. P., B. V. Dolishniy, O. V. Khmelevska, A. V. Poberezhskyy, and S. V. Vovnyuk, 2007, Evaporites of Ukraine: a review: Geological Society, London, Special Publications, v. 285, p. 309-334.

Lowenstein, T. K., 1988, Origin of depositional cycles in a Permian "saline giant"; the Salado (McNutt Zone) evaporites of New Mexico and Texas: Geological Society of America Bulletin, v. 100, p. 592-608.

Matthews, R. D., and G. C. Egleson, 1974, Origin and Implications of a Mid-Basin Potash Facies in the Salina Salt of Michigan, Fourth International Symposium on Salt, v. 1, Northern Ohio Geological Society, p. 15-34.

Mohriak, W.U., Nemcok, M., Enciso., G, 2008, South Atlantic divergent margin evolution: rift-border uplift and salt tectonics in the basins of SE Brazil R.J. Pankhurst, R.A.J. Trouw, B.B. Brito Neves, M.J. de Wit (Eds.), West Gondwana pre-Cenozoic correlations across the South Atlantic region, Geological Society, London, Special Publications, vol. 294 (2008), pp. 365–398

Petrova, N.S., 2010, Pyroclastic rocks in deposits of the potassic subformation of the Pripyat intracoincidental paleorift, GEOLOGIA, Tom 36, Zeszyt 3, p. 395-406

Prud'homme, M., and S. T. Krukowski, 2006, Potash, in J. E. Kogel, N. C. Trivedi, J. M. Barker, and S. T. Krukowski, eds., Industrial Minerals and Rocks, SME (Soc. Mining Metallurgy and Exploration), p. 723-742.

M.K. Reichow, M.S. Pringle, A.I. Al'Mukhamedov, M.B. Allen, V.L. Andreichev, M.M. Buslov, C.E. Davies, G.S. Fedoseev, J.G. Fitton, S. Inger, A.Y. Medvedev, C. Mitchell, V.N. Puchkov, I.Y. Safonova, R.A. Scott, A.D. Saunders, 2009m The timing and extent of the eruption of the Siberian Traps large igneous province: implications for the end-Permian environmental crisis, Earth Planet. Sci. Lett., 277 (2009), pp. 9–20

Richter-Bernburg, G., 1986, Zechstein salt correlation: England-Denmark-Germany: Geological Society, London, Special Publications, v. 22, p. 165-168.

Rosell, L., and F. Ortí, 1981, The saline (potash) formation of the Navarra basin (Upper Eocene, Spain). Petrology: Revista Instituto Investigaciones Geologicas, v. 35, p. 71-121.

Smith, D. B., 1996, Deformation in the late Permian Boulby Halite (EZ3Na) in Teesside, NE England: Geological Society, London, Special Publications, v. 100, p. 77-87.

Smith, D. B., and A. Crosby, 1979, The regional and stratigraphical context of Zechstein 3 and 4 potash deposits in the British sector of the southern North Sea and adjoining land areas: Economic Geology, v. 74, p. 397-408.

Szatmari, P., R. S. Carvalho, and I. A. Simoes, 1979, A comparison of evaporite facies in the late Paleozoic Amazon and the Middle Cretaceous South Atlantic salt basins: Economic Geology, v. 74, p. 432-447.

Urien, C.M., and Zambrano, J.J., 1994, Petroleum Systems in the Neuquen Basin, Argentina: Chapter 32: Part V. Case Studies–Western Hemisphere, AAPG Memoir, M 60: The Petroleum System—From Source to Trap, P. 513-534, AAPG.

Volozh, Y., C. J. Talbot, and A. Ismail-Zadeh, 2003, Salt structures and hydrocarbons in the Pricaspian basin: Bulletin American Association Petroleum Geologists, v. 87, p. 313-334.

Wardlaw, N. C., 1972, Unusual marine evaporites with salts of calcium and magnesium chloride in Cretaceous basins of Sergipe, Brazil: Economic Geology, v. 67, p. 156-168.

Warren, J. K., 2000, Geological controls on the quality of potash, in R. M. Geertmann, ed., 8th World Salt Symposium, v. 1: Amsterdam, Elsevier, p. 173-180.

Warren, J. K., 2006, Evaporites: Sediments, Resources and Hydrocarbons: Berlin, Springer, 1036 p.

Warren, J. K., 2010, Evaporites through time: Tectonic, climatic and eustatic controls in marine and nonmarine deposits: Earth-Science Reviews, v. 98, p. 217-268.

Williams-Stroud, S. C., 1994, Solution to the Paradox? Results of some chemical equilibrium and mass balance calculations applied to the Paradox Basin evaporite deposit: American Journal of Science, v. 294, p. 1189-1228.

Wilson, P., J. C. White, and B. V. Roulston, 2006, Structural geology of the Penobscuis salt structure: late Bashkirian inversion tectonics in the Moncton Basin, New Brunswick, eastern Canada: Canadian Journal of Earth Sciences, v. 43, p. 405.

Woods, P. J. E., 1979, The geology of Boulby Mine: Economic Geology, v. 74, p. 409-418.

Zharkov, M. A., 1984, Paleozoic salt bearing formations of the world: Berlin, Springer Verlag, 427 p.



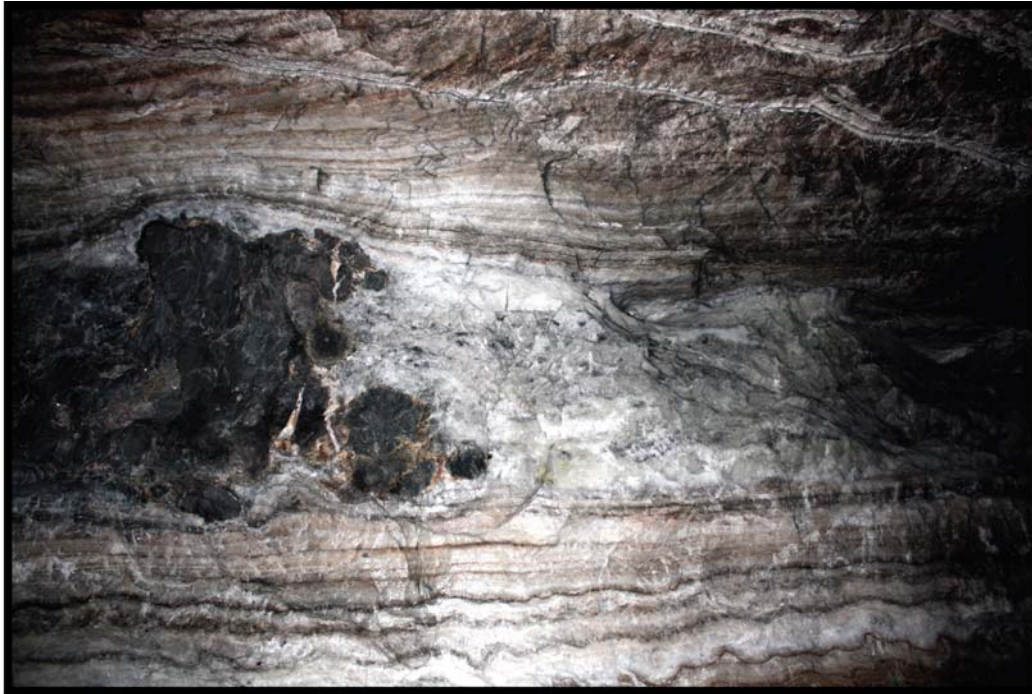

Figure DR1. Photo showing localized nature of the doming and host rock deformation which has accommodated sill emplacement.

Movie DR1

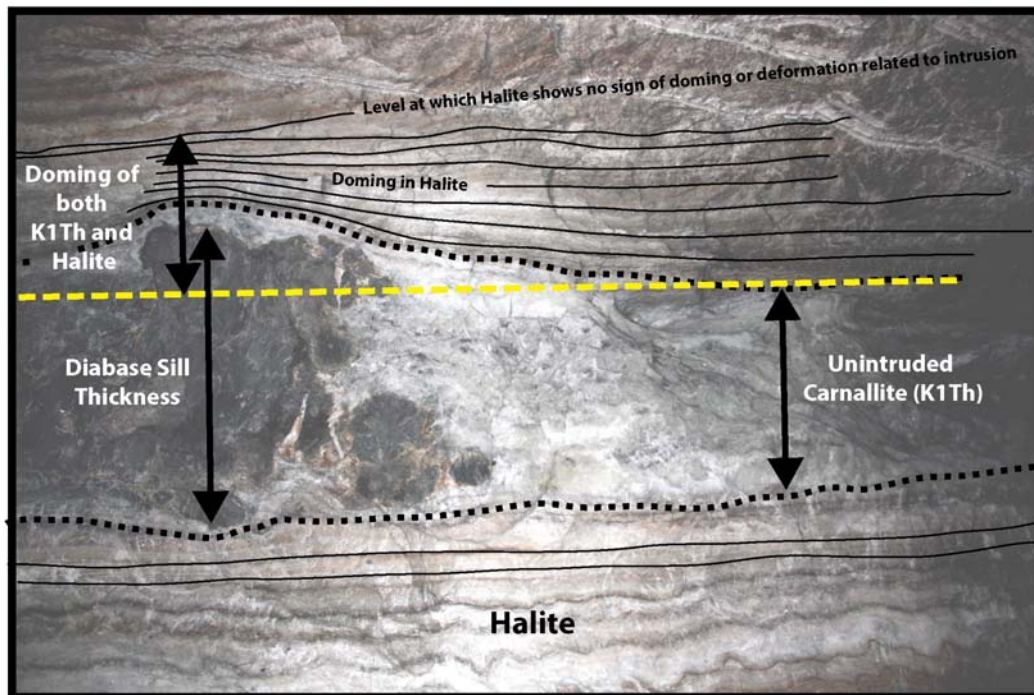

Figure DR1. nb. note all doming/deformation of Halite related to the sill intrusion is directed upwards
